# Supplementary material for: Effect of H2O Activity on Zeolite Formation
Source: MDPI journal article supplement (doi:10.3390/ma13214780), 2020-10-26
Supplement: s1 [file s1]

## Supplementary Materials

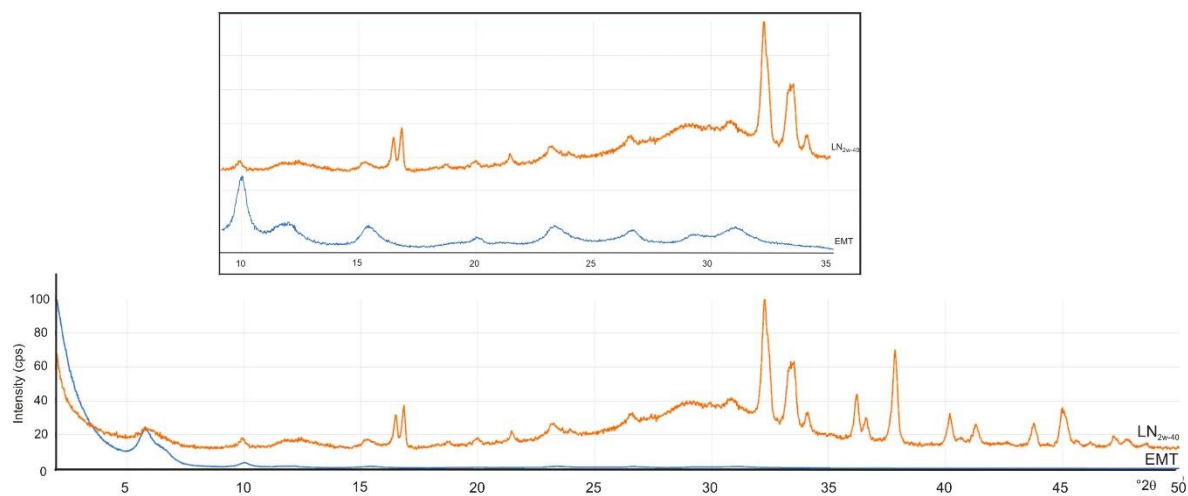

**Figure S1.** X-ray diffraction profiles of LN<sub>2w-40</sub> and calculated EMT zeolite.
